# Supplementary material for: Poziotinib Inhibits HER2-Mutant–Driven Therapeutic Resistance and Multiorgan Metastasis in Breast Cancer
Source: PubMed Central journal article supplement — Cancer Res. 2022 Jun 23;82(16):2928–39. doi: 10.1158/0008-5472.CAN-21-3106 (PMC9379360; doi:10.1158/0008-5472.can-21-3106), 2022-06-23

# SUPPLEMENTARY FIGURE S2

**A**

METABRIC ER+ IDC

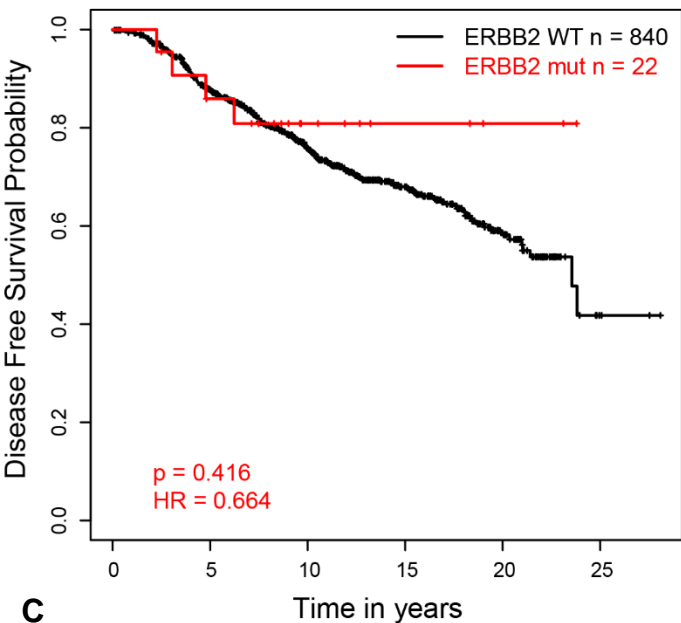

**B**

METABRIC ER+ IDC

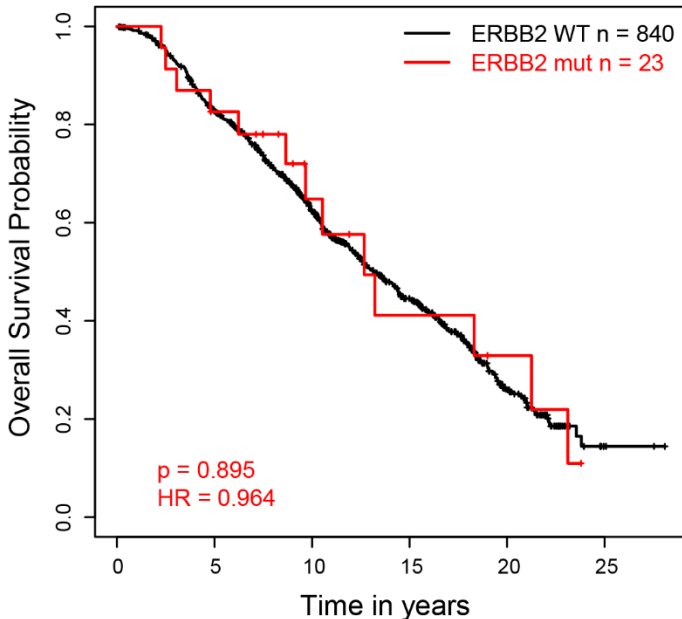

**C**

METABRIC

Invasive Lobular Carcinoma (n = 11/114 samples)

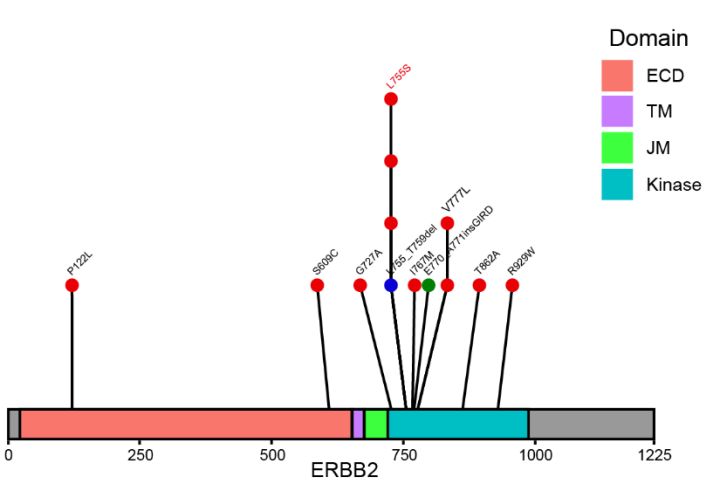

Invasive Ductal Carcinoma (n = 25/915 samples)

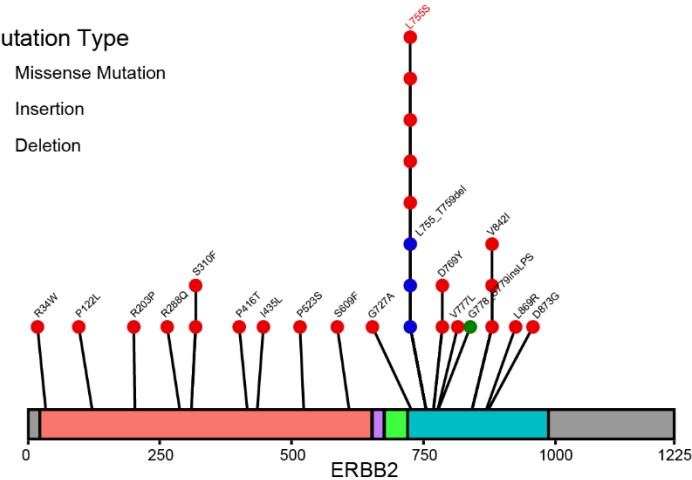

Supplement: can-21-3106_supplementary_data_suppsf2.pdf [file can-21-3106_supplementary_data_suppsf2.pdf]
