# Supplementary material for: Poziotinib Inhibits HER2-Mutant–Driven Therapeutic Resistance and Multiorgan Metastasis in Breast Cancer
Source: PubMed Central journal article supplement — Cancer Res. 2022 Jun 23;82(16):2928–39. doi: 10.1158/0008-5472.CAN-21-3106 (PMC9379360; doi:10.1158/0008-5472.can-21-3106), 2022-06-23

# SUPPLEMENTARY FIGURE S6

**A**

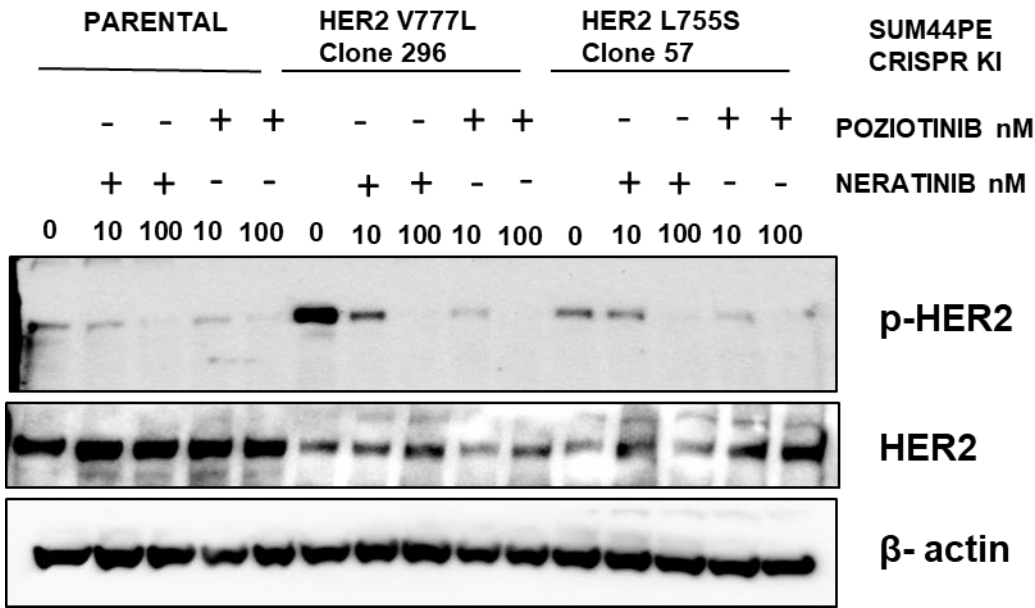

**B ERBB2 V777L Clone 296**

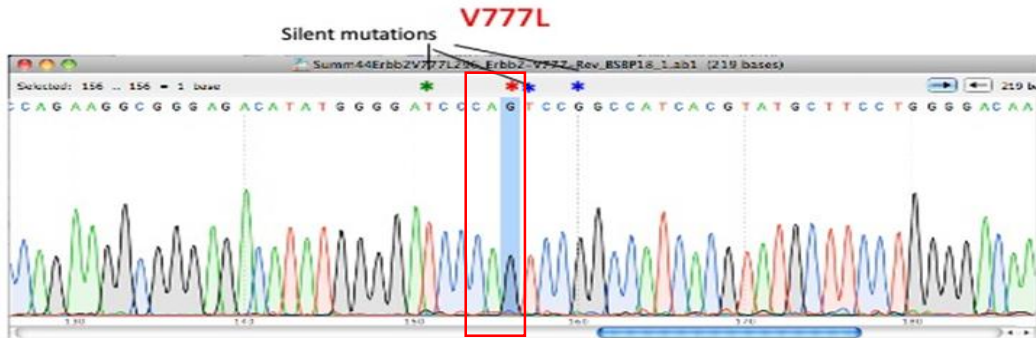

**ERBB2 L755S Clone 57**

1 knockin allele, 1 indel (insertion of 'A' at the CRISPR cleavage site)

\* L755S mutation \* silent mutation

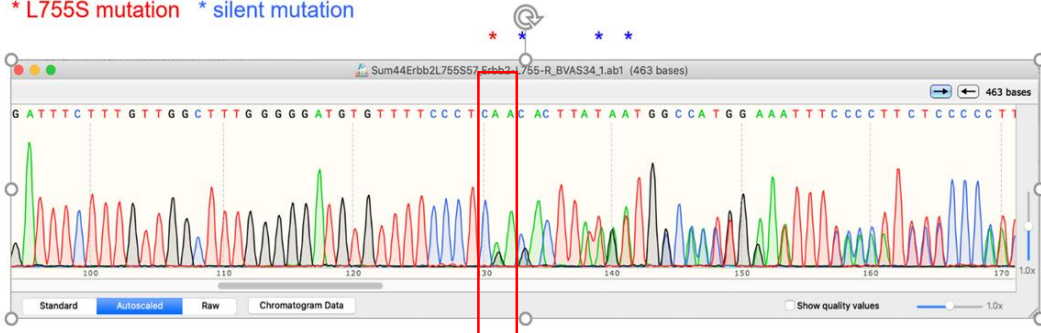

Supplement: can-21-3106_supplementary_data_suppsf6.pdf [file can-21-3106_supplementary_data_suppsf6.pdf]
