# Supplementary material for: Poziotinib Inhibits HER2-Mutant–Driven Therapeutic Resistance and Multiorgan Metastasis in Breast Cancer
Source: Oxford University Press journal article supplement (doi:10.1158/0008-5472.can-21-3106), 2022-06-23
Supplement: can-21-3106_supplementary_data_suppst1.xlsx [file can-21-3106_supplementary_data_suppst1.xlsx]

## Sheet: METABRIC
SAMPLE_ID	CANCER_TYPE_DETAILED	ERBB2_cna	ERBB2_mut	Notes: We excluded splice and frameshift mutaions in our study
MB-0302	Breast Invasive Lobular Carcinoma	0	E770_A771insGIRD	11 samples (11 missense mutations, 1 insertion, 1 deletion)
MB-0429	Breast Invasive Lobular Carcinoma	1	R929W
MB-0653	Breast Invasive Lobular Carcinoma	0	S609C
MB-3002	Breast Invasive Lobular Carcinoma	0	P122L
MB-4721	Breast Invasive Lobular Carcinoma	0	L755S
MB-4992	Breast Invasive Lobular Carcinoma	1	V777L T862A
MB-4998	Breast Invasive Lobular Carcinoma	1	L755_T759del
MB-5329	Breast Invasive Lobular Carcinoma	-1	V777L G727A
MB-5563	Breast Invasive Lobular Carcinoma	2	L755S
MB-6023	Breast Invasive Lobular Carcinoma	0	I767M
MB-7173	Breast Invasive Lobular Carcinoma	0	L755S
				Yellow highlighted patient samples have more than 1 mutation per sample
MB-0226	Breast Invasive Ductal Carcinoma	0	V842I	25 samples (24 missense mutations, 1 insertion, 3 Deletions)
MB-0455	Breast Invasive Ductal Carcinoma	0	D769Y
MB-0509	Breast Invasive Ductal Carcinoma	0	L755S
MB-0607	Breast Invasive Ductal Carcinoma	2	S310F E139Sfs*11
MB-0872	Breast Invasive Ductal Carcinoma	0	L755_T759del
MB-2564	Breast Invasive Ductal Carcinoma	0	P122L
MB-3028	Breast Invasive Ductal Carcinoma	2	L755S
MB-3295	Breast Invasive Ductal Carcinoma	0	P523S
MB-3430	Breast Invasive Ductal Carcinoma	0	R288Q
MB-3748	Breast Invasive Ductal Carcinoma	0	R203P
MB-4012	Breast Invasive Ductal Carcinoma	0	D873G
MB-5130	Breast Invasive Ductal Carcinoma	-1	V777L G727A
MB-5152	Breast Invasive Ductal Carcinoma	0	L755S V842I P416T
MB-5404	Breast Invasive Ductal Carcinoma	0	R34W
MB-5513	Breast Invasive Ductal Carcinoma	-1	S609F
MB-5629	Breast Invasive Ductal Carcinoma	0	L869R
MB-5656	Breast Invasive Ductal Carcinoma	0	L755S
MB-6071	Breast Invasive Ductal Carcinoma	0	L755_T759del
MB-7022	Breast Invasive Ductal Carcinoma	0	L755S
MB-7028	Breast Invasive Ductal Carcinoma	0	I435L
MB-7066	Breast Invasive Ductal Carcinoma	0	S310F
MB-7074	Breast Invasive Ductal Carcinoma	0	L755_T759del
MB-7122	Breast Invasive Ductal Carcinoma	0	G778_S779insLPS
MB-7153	Breast Invasive Ductal Carcinoma	0	V842I
MB-7288	Breast Invasive Ductal Carcinoma	0	D769Y
				Yellow highlighted patient samples have more than 1 mutation per sample

## Sheet: MSK-IMPACT
Supplementary Table 1. Clinical Information on HER2 somatic mutation and HER2 amplification status in ER+ILC and IDC breast cancer patients in both METABRIC and MSK-IMPACT studies.
PATIENT_ID	SAMPLE_ID	CANCER_TYPE_DETAILED	ERBB2_cna	ERBB2_mut	Notes: We excluded splice and frameshift mutaions in our study
P-0000547	P-0000547-T01-IM3	Breast Invasive Lobular Carcinoma	0	L755S	32 samples (29 missense mutations, 5 insertions)
P-0000607	P-0000607-T01-IM3	Breast Invasive Lobular Carcinoma	0	R1153L
P-0000820	P-0000820-T01-IM3	Breast Invasive Lobular Carcinoma	0	L755S
P-0000820	P-0000820-T02-IM3	Breast Invasive Lobular Carcinoma	0	L755S
P-0001718	P-0001718-T01-IM3	Breast Invasive Lobular Carcinoma	0	D769Y
P-0002281	P-0002281-T01-IM3	Breast Invasive Lobular Carcinoma	0	S310F
P-0002281	P-0002281-T02-IM5	Breast Invasive Lobular Carcinoma	0	S310F L785F
P-0002696	P-0002696-T01-IM3	Breast Invasive Lobular Carcinoma	0	L755S
P-0003947	P-0003947-T01-IM3	Breast Invasive Lobular Carcinoma	0	L869R
P-0004293	P-0004293-T01-IM5	Breast Invasive Lobular Carcinoma	2	T297I
P-0004555	P-0004555-T01-IM5	Breast Invasive Lobular Carcinoma	0	L755S
P-0004670	P-0004670-T01-IM5	Breast Invasive Lobular Carcinoma	0	S310Y
P-0006910	P-0006910-T01-IM5	Breast Invasive Lobular Carcinoma	2	L755S
P-0006910	P-0006910-T02-IM6	Breast Invasive Lobular Carcinoma	0	L755S
P-0007577	P-0007577-T01-IM5	Breast Invasive Lobular Carcinoma	0	W825* M833I I886M X1097_splice
P-0008007	P-0008007-T01-IM5	Breast Invasive Lobular Carcinoma	0	L755S
P-0009822	P-0009822-T01-IM5	Breast Invasive Lobular Carcinoma	0	V777L
P-0010201	P-0010201-T01-IM5	Breast Invasive Lobular Carcinoma	0	L755S
P-0010321	P-0010321-T01-IM5	Breast Invasive Lobular Carcinoma	0	G778_P780dup
P-0010431	P-0010431-T01-IM5	Breast Invasive Lobular Carcinoma	0	E770_A771insGIRD
P-0010655	P-0010655-T01-IM5	Breast Invasive Lobular Carcinoma	0	L869R
P-0012836	P-0012836-T01-IM5	Breast Invasive Lobular Carcinoma	2	L869R
P-0013172	P-0013172-T01-IM5	Breast Invasive Lobular Carcinoma	0	G778_S779insLPG
P-0013751	P-0013751-T01-IM5	Breast Invasive Lobular Carcinoma	0	V777L
P-0014372	P-0014372-T01-IM6	Breast Invasive Lobular Carcinoma	0	E770_A771insGIRD
P-0014493	P-0014493-T01-IM6	Breast Invasive Lobular Carcinoma	0	L869R
P-0015535	P-0015535-T01-IM6	Breast Invasive Lobular Carcinoma	0	L755S
P-0016041	P-0016041-T01-IM6	Breast Invasive Lobular Carcinoma	0	L755S
P-0016141	P-0016141-T01-IM6	Breast Invasive Lobular Carcinoma	0	E744D
P-0016202	P-0016202-T01-IM6	Breast Invasive Lobular Carcinoma	0	V777L
P-0017098	P-0017098-T01-IM6	Breast Invasive Lobular Carcinoma	0	E770_A771insGIRD
P-0017156	P-0017156-T01-IM6	Breast Invasive Lobular Carcinoma	0	H878Y
					Yellow highlighted samples have more than 1 mutation per sample
P-0000081	P-0000081-T02-IM6	Breast Invasive Ductal Carcinoma	0	E770_A771insGIRD	32 samples (22 missense mutations, 11 insertions)
P-0000204	P-0000204-T02-IM3	Breast Invasive Ductal Carcinoma	0	I767M
P-0000281	P-0000281-T02-IM3	Breast Invasive Ductal Carcinoma	2	E770_A771insGIRD
P-0000281	P-0000281-T01-IM3	Breast Invasive Ductal Carcinoma	0	E770_A771insGIRD
P-0001338	P-0001338-T02-IM3	Breast Invasive Ductal Carcinoma	2	R678Q
P-0001338	P-0001338-T01-IM3	Breast Invasive Ductal Carcinoma	0	R678Q
P-0001874	P-0001874-T01-IM3	Breast Invasive Ductal Carcinoma	0	V777L
P-0003054	P-0003054-T01-IM5	Breast Invasive Ductal Carcinoma	0	S310F Q1206K
P-0003118	P-0003118-T01-IM5	Breast Invasive Ductal Carcinoma	0	G778_S779insLPG
P-0003273	P-0003273-T01-IM5	Breast Invasive Ductal Carcinoma	2	V777L
P-0003273	P-0003273-T03-IM5	Breast Invasive Ductal Carcinoma	2	V777L
P-0003859	P-0003859-T01-IM5	Breast Invasive Ductal Carcinoma	0	L755S
P-0004237	P-0004237-T01-IM5	Breast Invasive Ductal Carcinoma	0	T862A
P-0004558	P-0004558-T01-IM5	Breast Invasive Ductal Carcinoma	0	L755S
P-0004908	P-0004908-T01-IM5	Breast Invasive Ductal Carcinoma	0	G778_S779insLPS
P-0004908	P-0004908-T02-IM5	Breast Invasive Ductal Carcinoma	0	G778_S779insLPS
P-0004909	P-0004909-T02-IM5	Breast Invasive Ductal Carcinoma	0	G727A
P-0005940	P-0005940-T01-IM5	Breast Invasive Ductal Carcinoma	2	A37T
P-0006376	P-0006376-T01-IM5	Breast Invasive Ductal Carcinoma	0	G778_S779insLPS
P-0006376	P-0006376-T02-IM5	Breast Invasive Ductal Carcinoma	0	G778_S779insLPS
P-0006376	P-0006376-T03-IM6	Breast Invasive Ductal Carcinoma	0	G778_S779insLPS
P-0009181	P-0009181-T01-IM5	Breast Invasive Ductal Carcinoma	0	D873G
P-0009181	P-0009181-T02-IM5	Breast Invasive Ductal Carcinoma	0	D873G
P-0009829	P-0009829-T01-IM5	Breast Invasive Ductal Carcinoma	0	E770_A771insGIRD
P-0011261	P-0011261-T01-IM5	Breast Invasive Ductal Carcinoma	0	D769Y
P-0011365	P-0011365-T01-IM5	Breast Invasive Ductal Carcinoma	0	W906C
P-0012591	P-0012591-T01-IM5	Breast Invasive Ductal Carcinoma	0	V777L
P-0013454	P-0013454-T01-IM5	Breast Invasive Ductal Carcinoma	0	E770_A771insGIRD
P-0014034	P-0014034-T01-IM5	Breast Invasive Ductal Carcinoma	0	L1197F
P-0014267	P-0014267-T01-IM6	Breast Invasive Ductal Carcinoma	0	S310F
P-0014702	P-0014702-T01-IM6	Breast Invasive Ductal Carcinoma	0	L755S
P-0014867	P-0014867-T01-IM6	Breast Invasive Ductal Carcinoma	0	G1055C
					Yellow highlighted samples have more than 1 mutation per sample
