# Supplementary material for: Poziotinib Inhibits HER2-Mutant–Driven Therapeutic Resistance and Multiorgan Metastasis in Breast Cancer
Source: PubMed Central journal article supplement — Cancer Res. 2022 Jun 23;82(16):2928–39. doi: 10.1158/0008-5472.CAN-21-3106 (PMC9379360; doi:10.1158/0008-5472.can-21-3106), 2022-06-23
Supplement: can-21-3106_supplementary_data_suppst2.pdf [file can-21-3106_supplementary_data_suppst2.pdf]

## Supplementary Table 2. Media components for SUM44PE cells

| Component              | Stock Concentration | Working Concentration | Amount added to 500ml |
|------------------------|---------------------|-----------------------|-----------------------|
| Bovine Serum Albumin   | 20g/L               | 1g/L                  | 25ml                  |
| Ethanolamine           | 16.6M               | 5mM                   | 151 $\mu$ l           |
| HEPES                  | 1M                  | 10mM                  | 5ml                   |
| Hydrocortisone         | 1mg/ml              | 1 $\mu$ g/ml          | 500 $\mu$ l           |
| Insulin                | 10mg/ml             | 5 $\mu$ g/ml          | 250 $\mu$ l           |
| Sodium Selenite (Se)   | 20 $\mu$ g/ml       | 8.7ng/ml (50nM)       | 216 $\mu$ l           |
| apo-Transferrin        | 2.5mg/ml            | 5 $\mu$ g/ml          | 1ml                   |
| Triiodo Thyronine (T3) | 20 $\mu$ g/ml       | 6.7ng/ml (10nM)       | 168 $\mu$ l           |
