# Supplementary figures and images for: Poziotinib Inhibits HER2-Mutant–Driven Therapeutic Resistance and Multiorgan Metastasis in Breast Cancer
Source: PubMed Central journal article supplement — Cancer Res. 2022 Jun 23;82(16):2928–39. doi: 10.1158/0008-5472.CAN-21-3106 (PMC9379360; doi:10.1158/0008-5472.can-21-3106), 2022-06-23

**SUPPLEMENTARY FIGURE S10**

**A**

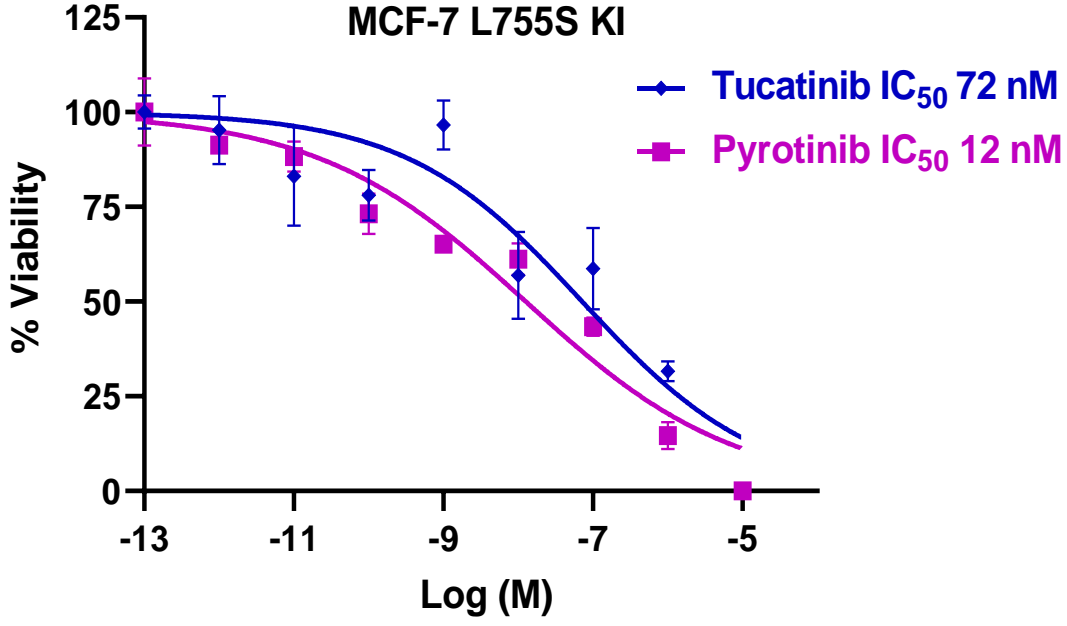

**B**

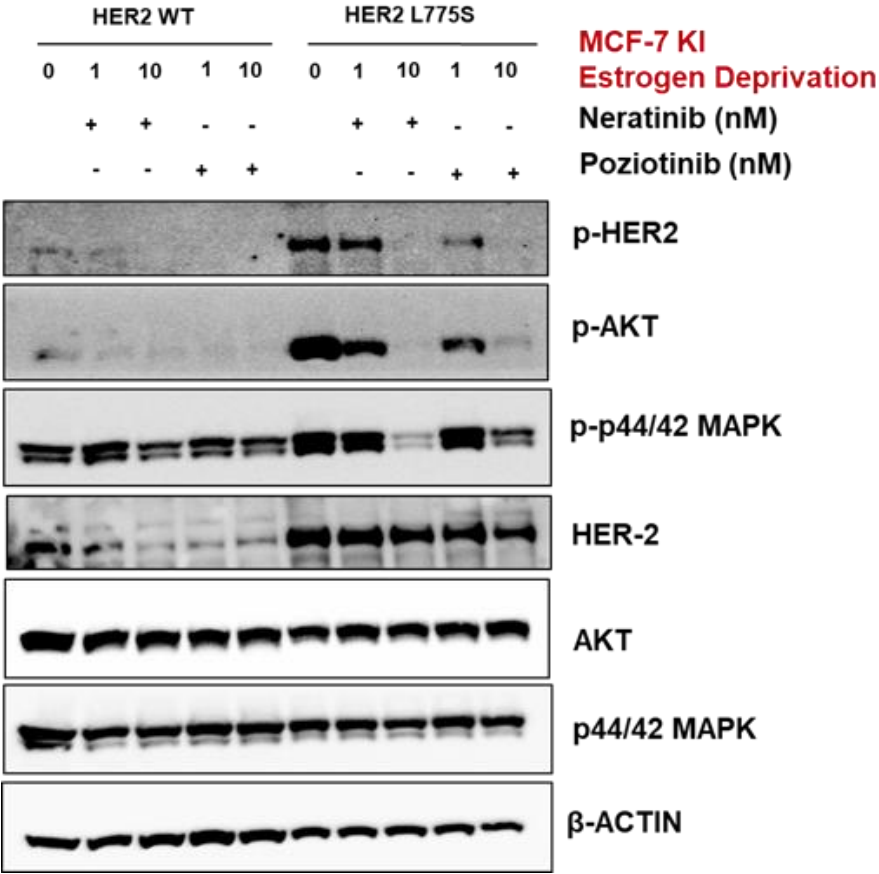

Supplement: can-21-3106_supplementary_data_suppsf10.pdf [file can-21-3106_supplementary_data_suppsf10.pdf]

# SUPPLEMENTARY FIGURE S3

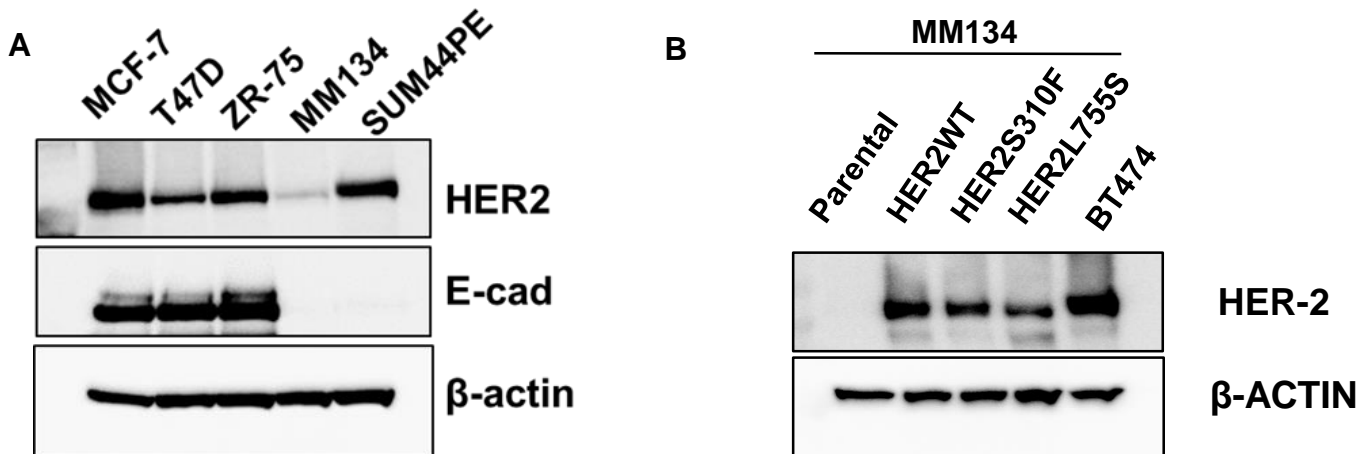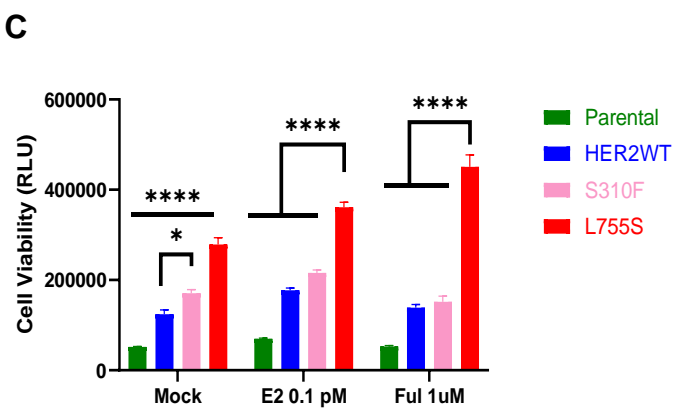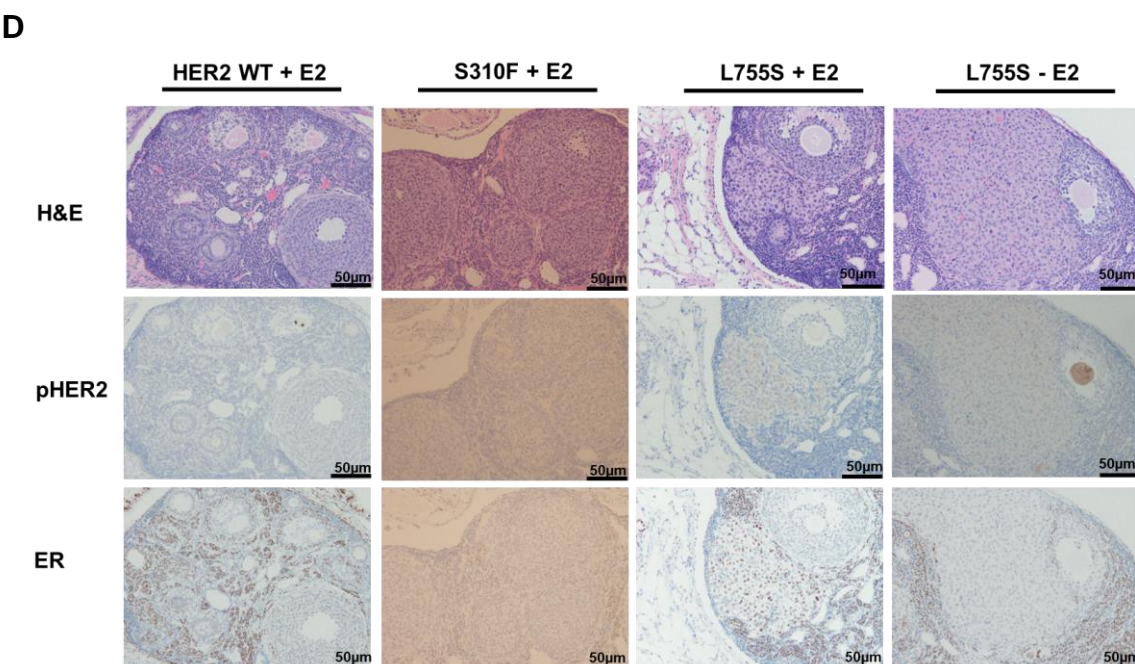

Supplement: can-21-3106_supplementary_data_suppsf3.pdf [file can-21-3106_supplementary_data_suppsf3.pdf]

# SUPPLEMENTARY FIGURE S4

**A**

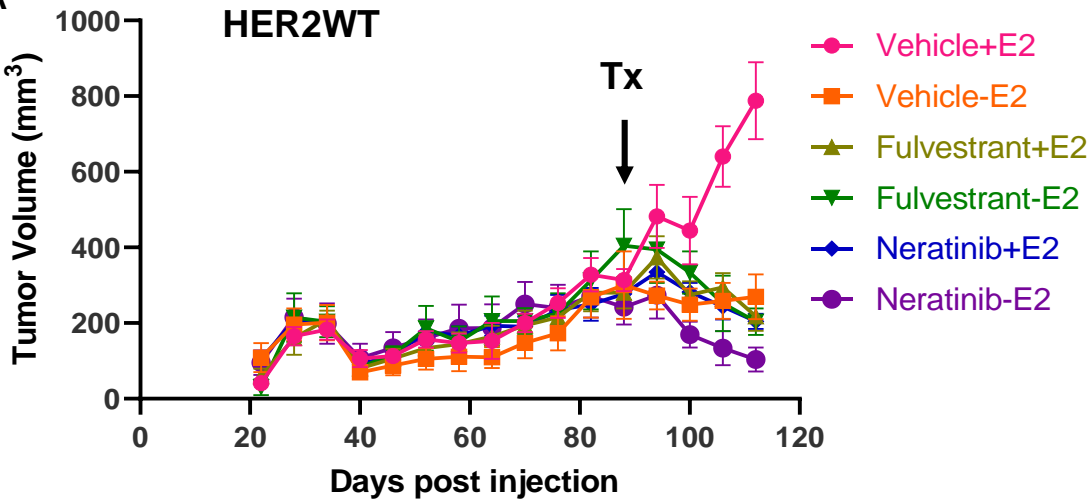

**B**

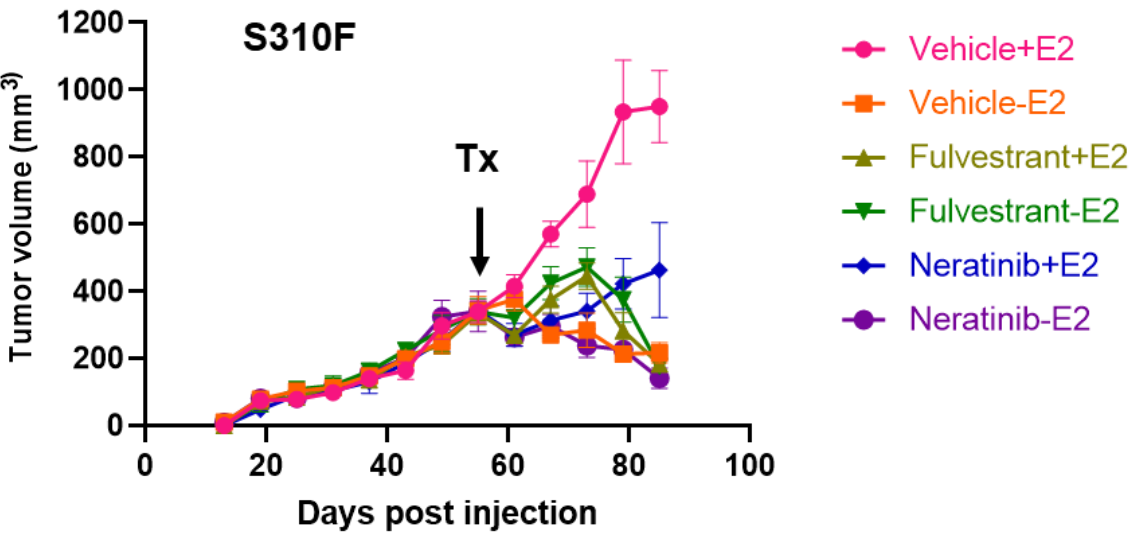

**C**

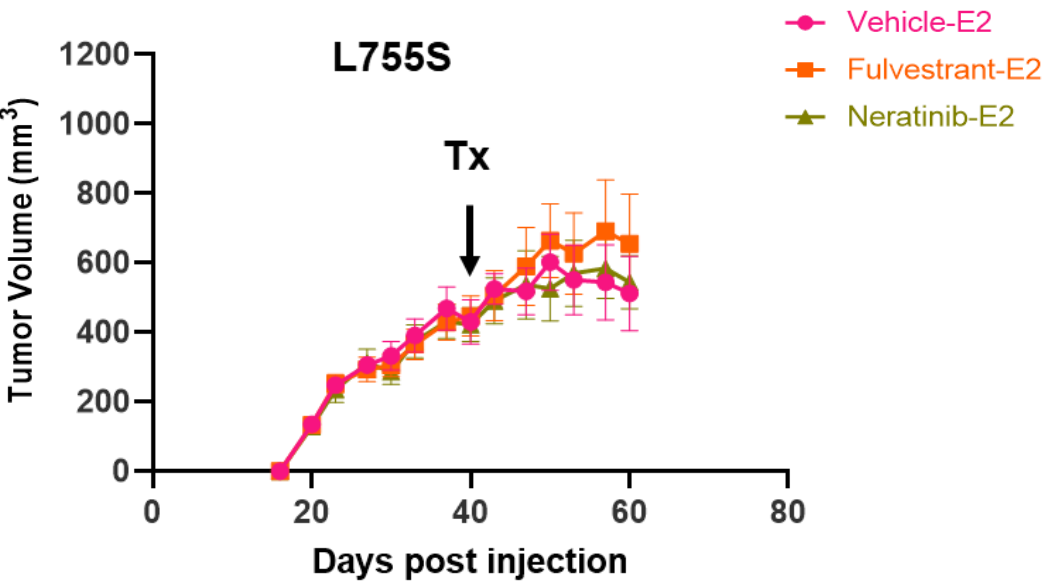

Supplement: can-21-3106_supplementary_data_suppsf4.pdf [file can-21-3106_supplementary_data_suppsf4.pdf]

# SUPPLEMENTARY FIGURE S5

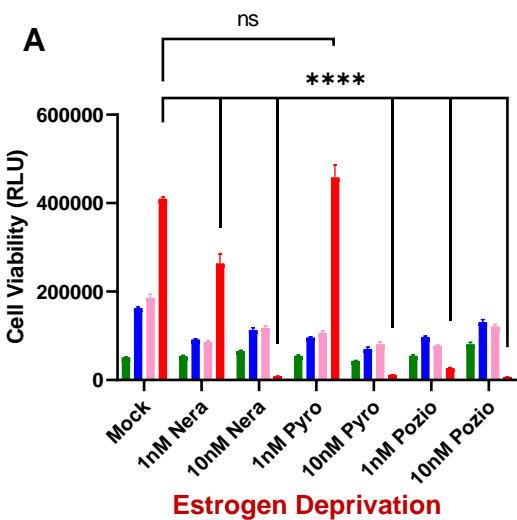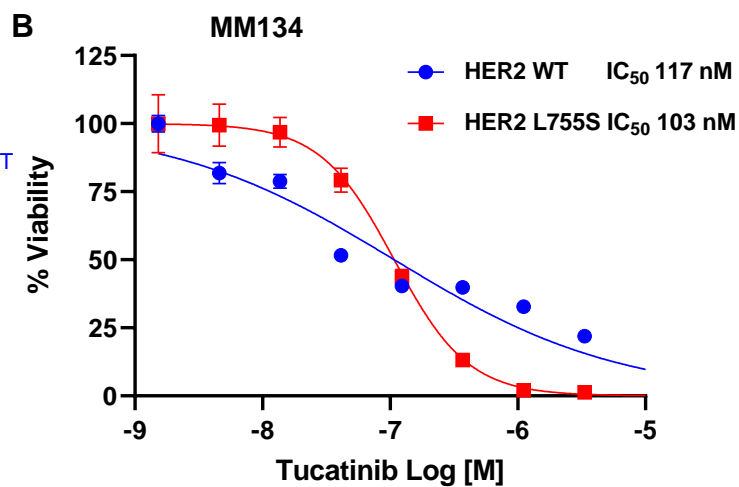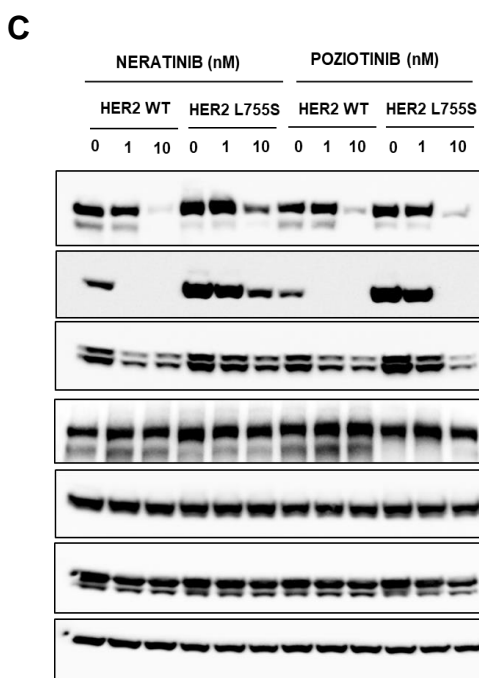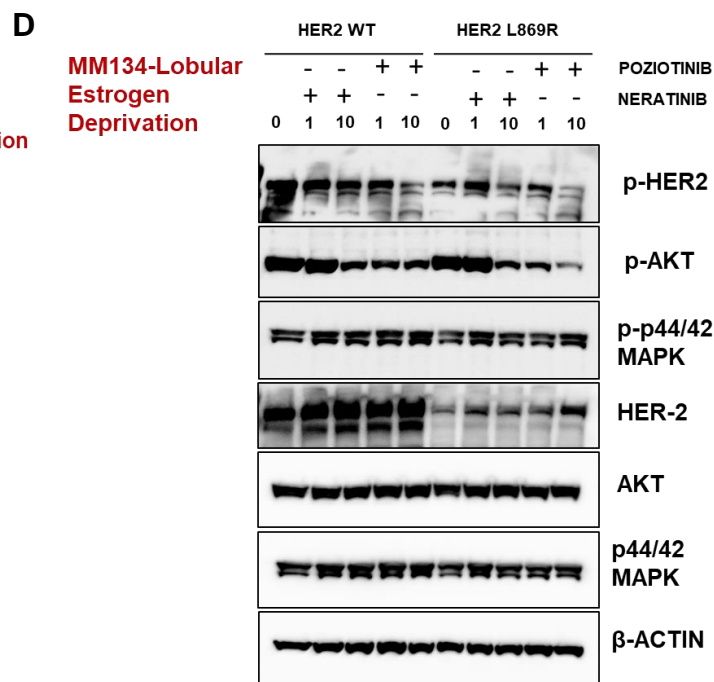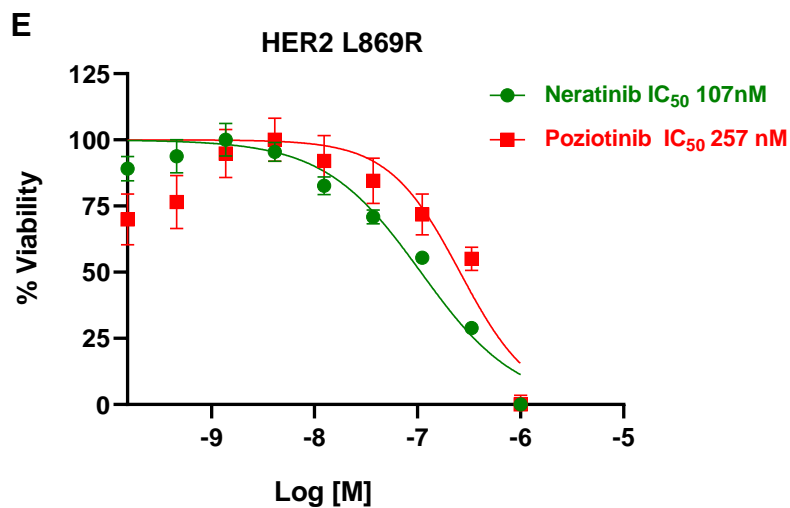

Supplement: can-21-3106_supplementary_data_suppsf5.pdf [file can-21-3106_supplementary_data_suppsf5.pdf]

# SUPPLEMENTARY FIGURE S7

**A**

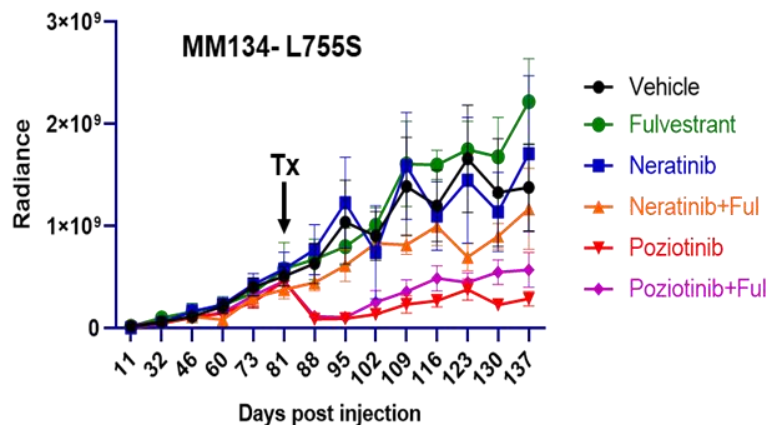

**B**

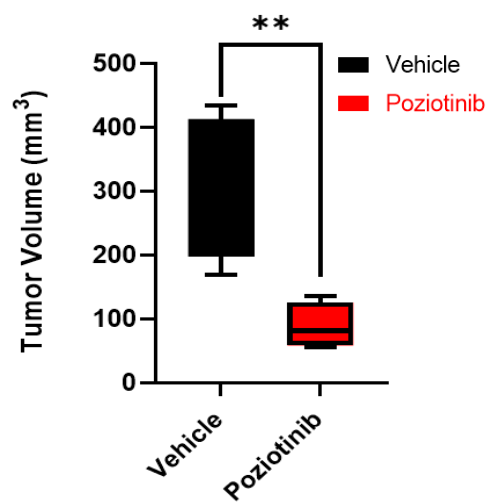

**C**

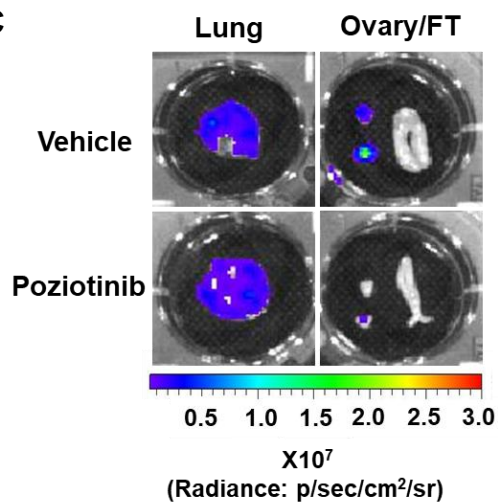

**D**

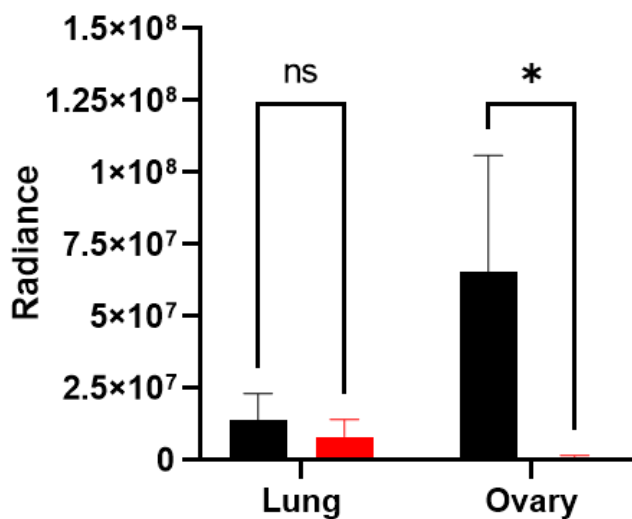

**E**

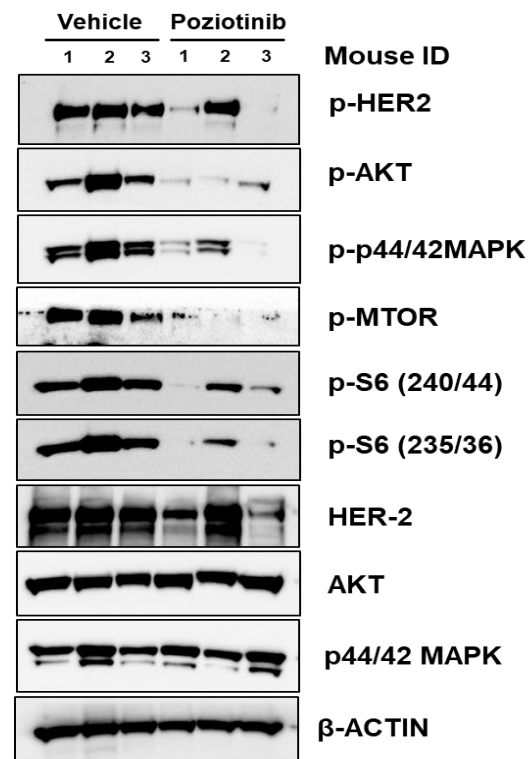

Supplement: can-21-3106_supplementary_data_suppsf7.pdf [file can-21-3106_supplementary_data_suppsf7.pdf]

# SUPPLEMENTARY FIGURE S8

A

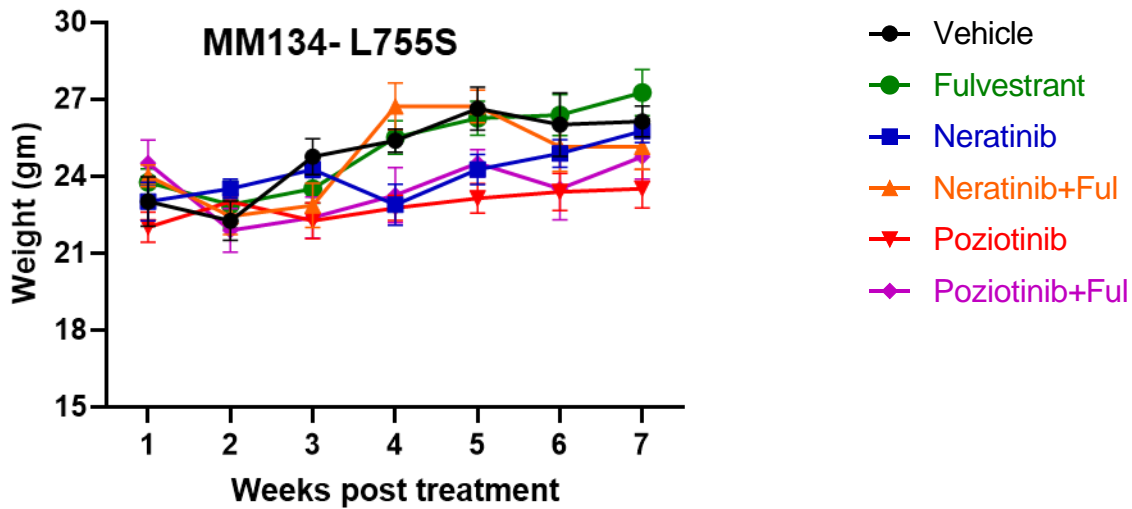

B

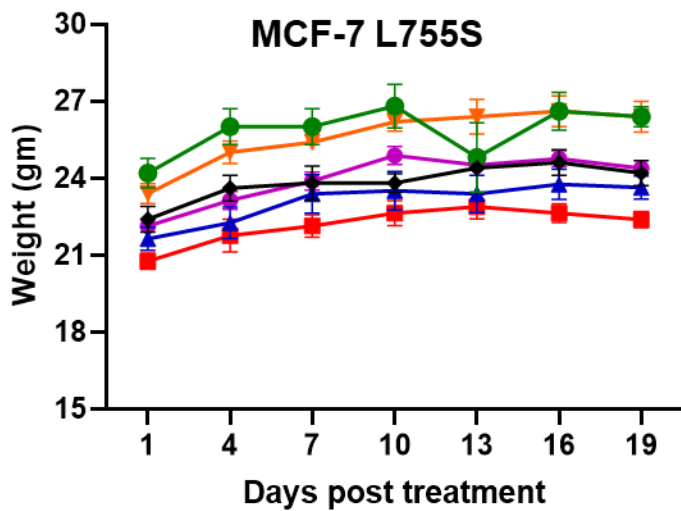

C

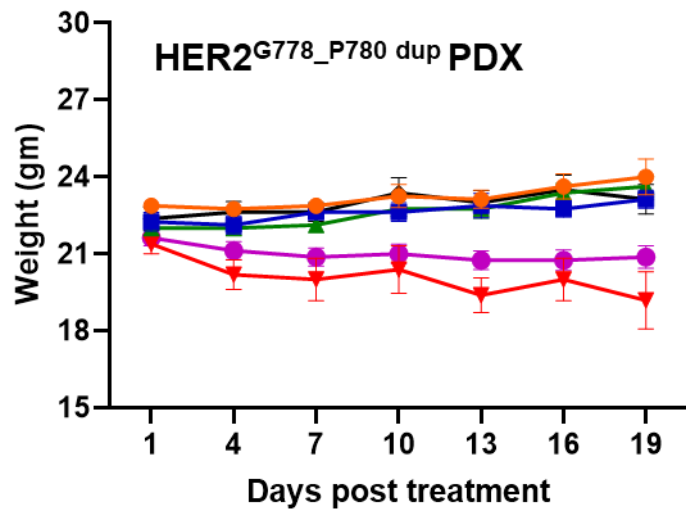

Supplement: can-21-3106_supplementary_data_suppsf8.pdf [file can-21-3106_supplementary_data_suppsf8.pdf]

# SUPPLEMENTARY FIGURE S9

**A**

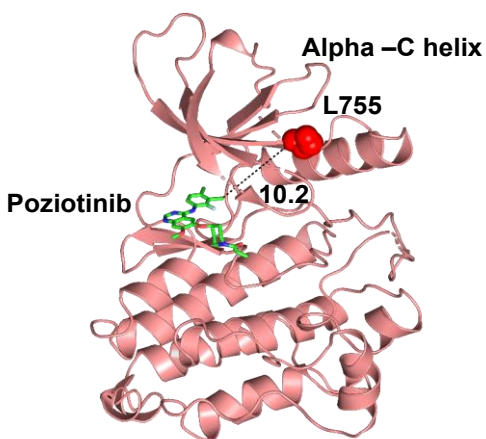

**B**

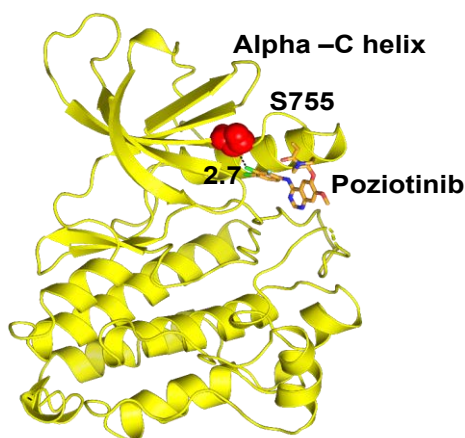

**C**

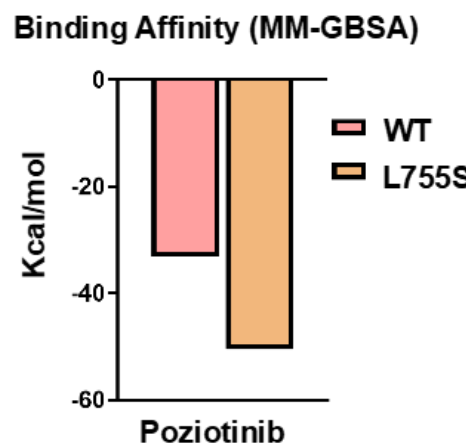

**D**

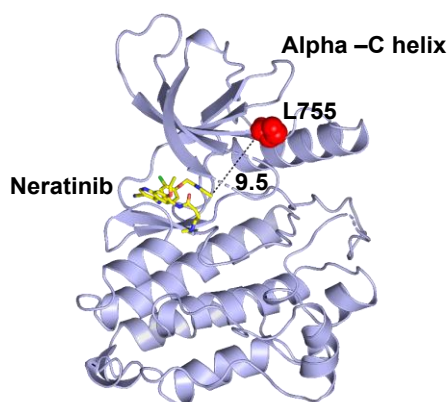

**E**

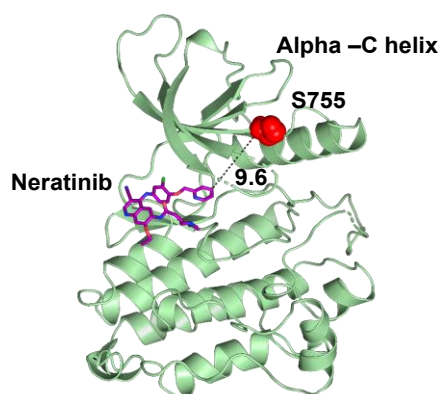

**F**

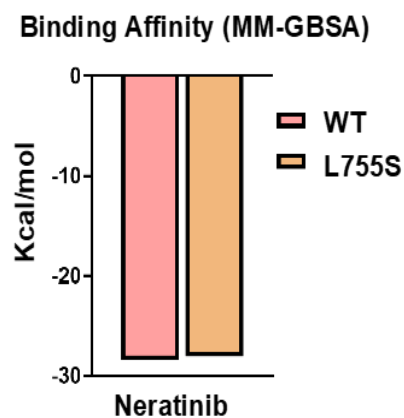

**G**

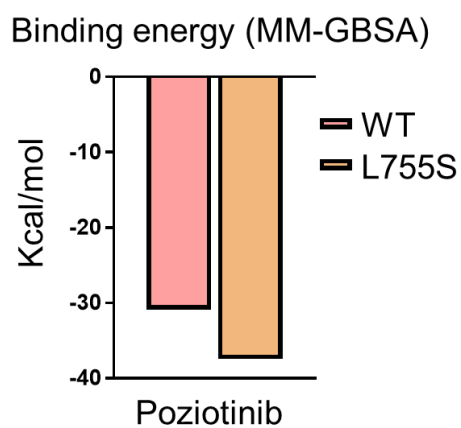

**H**

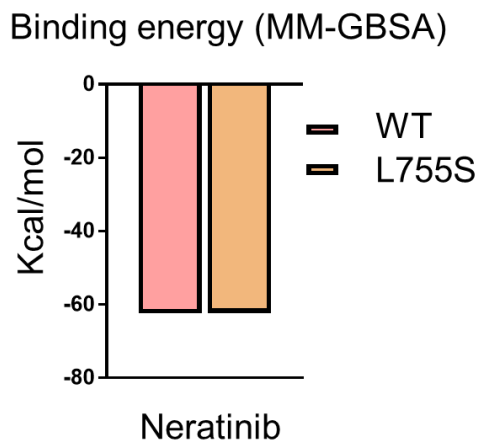

Supplement: can-21-3106_supplementary_data_suppsf9.pdf [file can-21-3106_supplementary_data_suppsf9.pdf]
